# Supplementary material for: Correlation Networks Provide New Insights into the Architecture of Testicular Steroid Pathways in Pigs
Source: MDPI journal article supplement (doi:10.3390/genes12040551), 2021-04-09

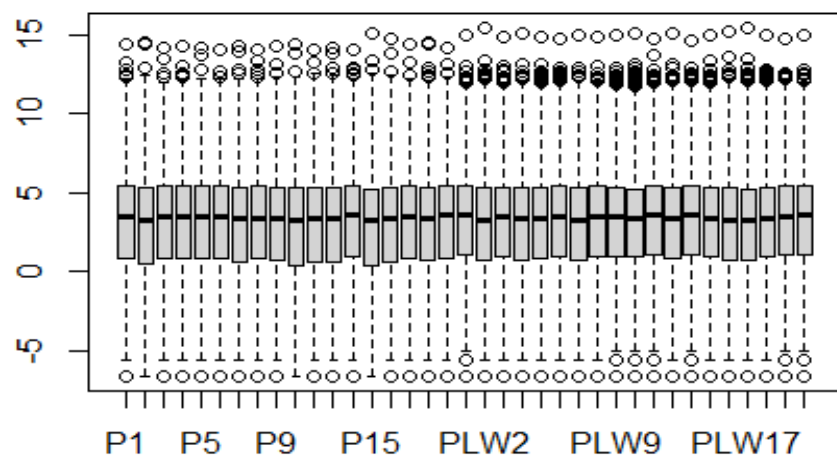

Figure S1A

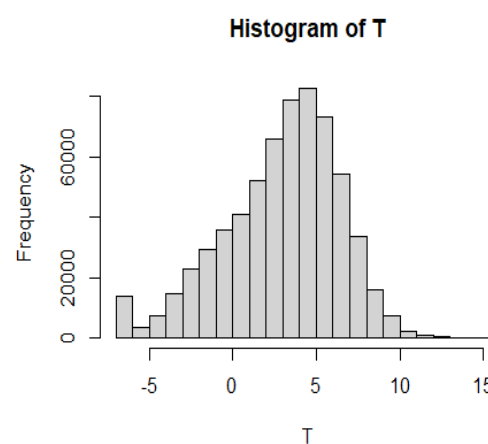

Figure S1B

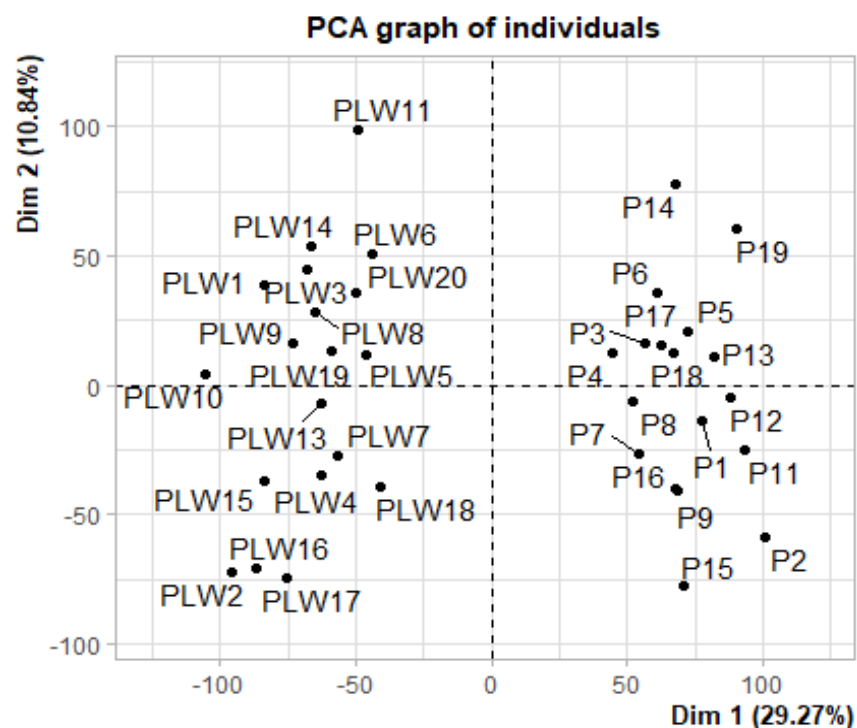

Figure S1C

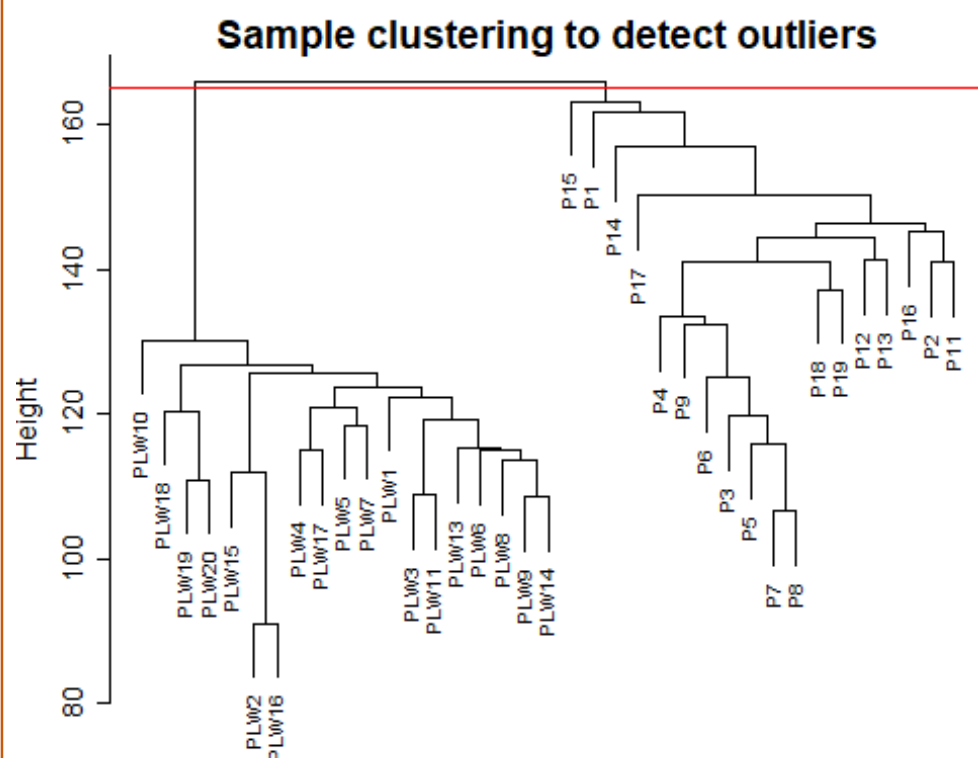

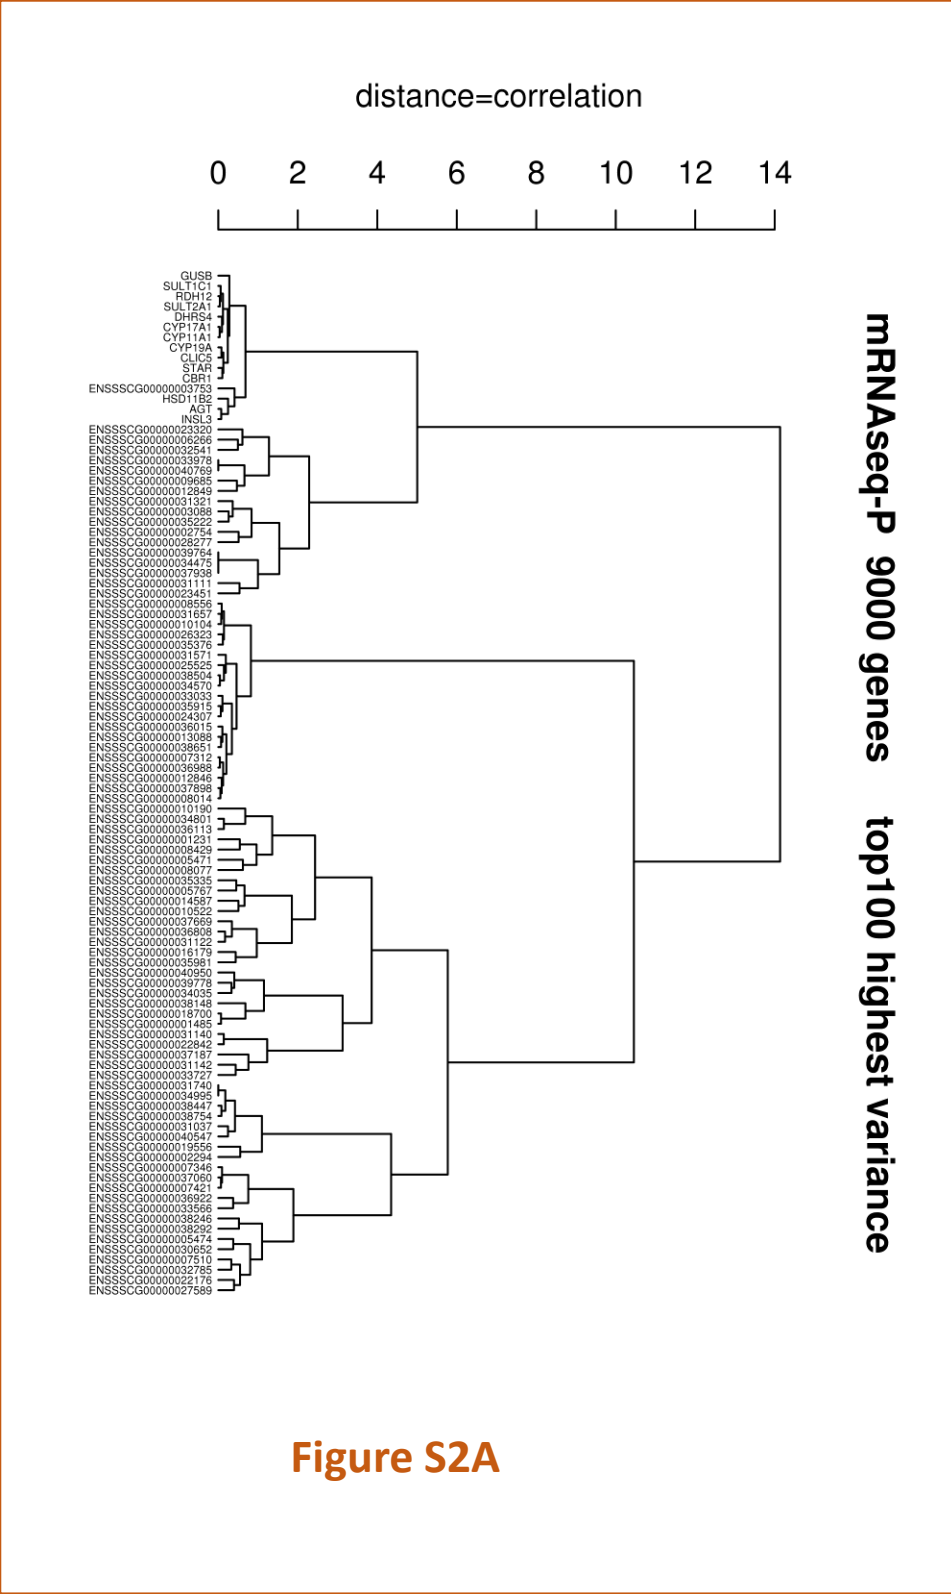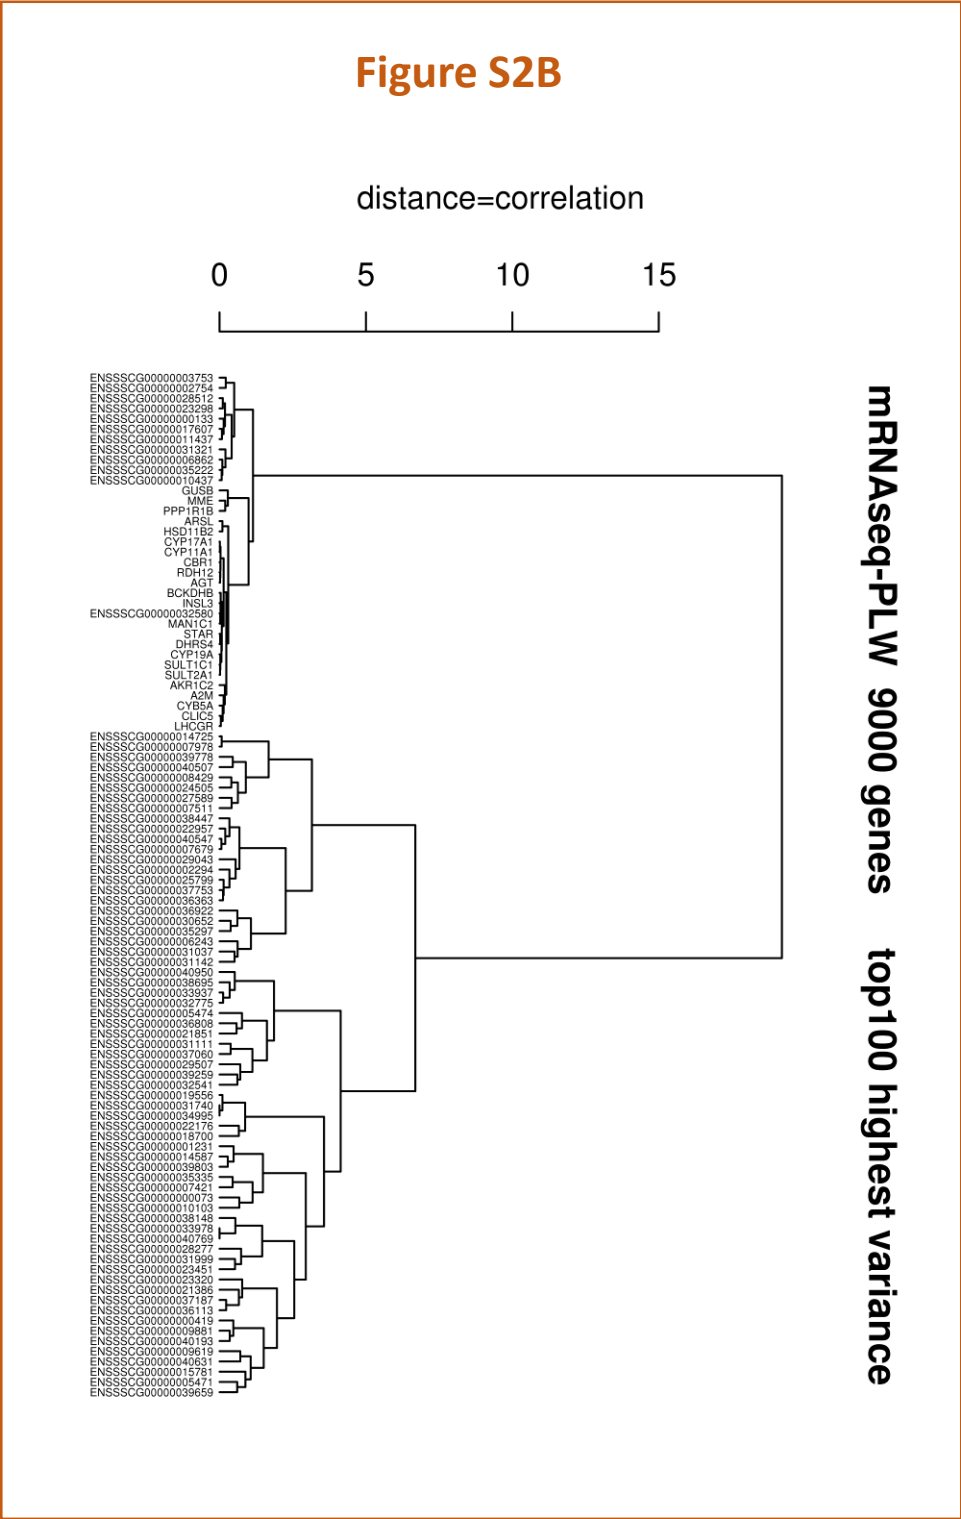

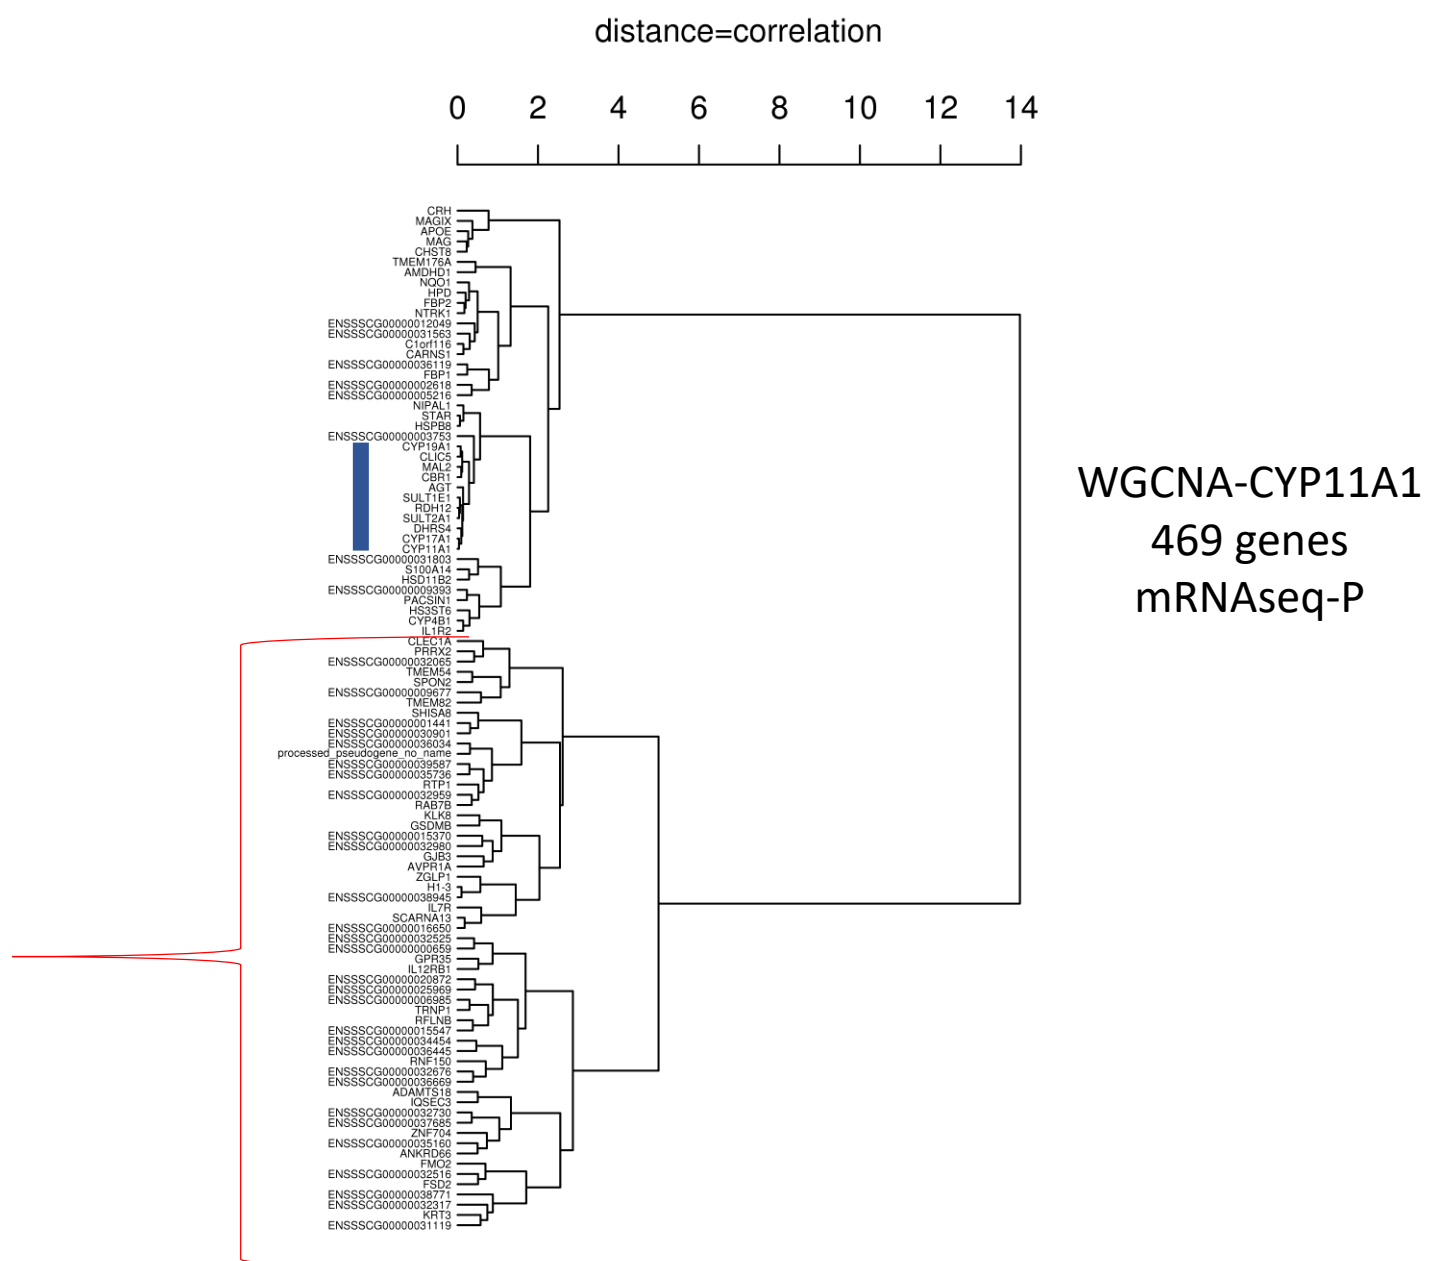

Figure S3

The top 100 genes with the biggest variance were retained to perform the hierarchical clustering using correlation as distance (agglomeration: ward).

**Figure S4** WGCNA-CYP11A1 (469 genes) mRNAseq-P

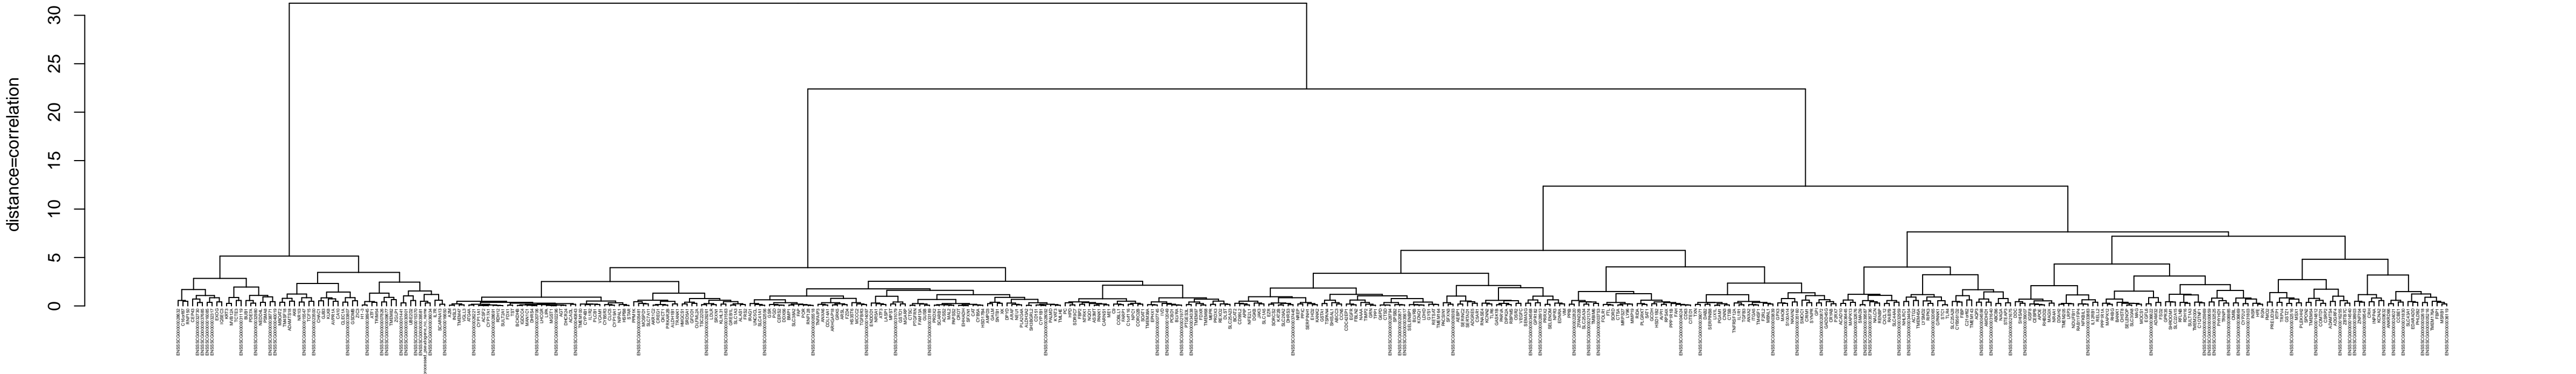

**Figure S5**      **WGCNA-CYP11A1 (469 genes) mRNAseq-PLW**

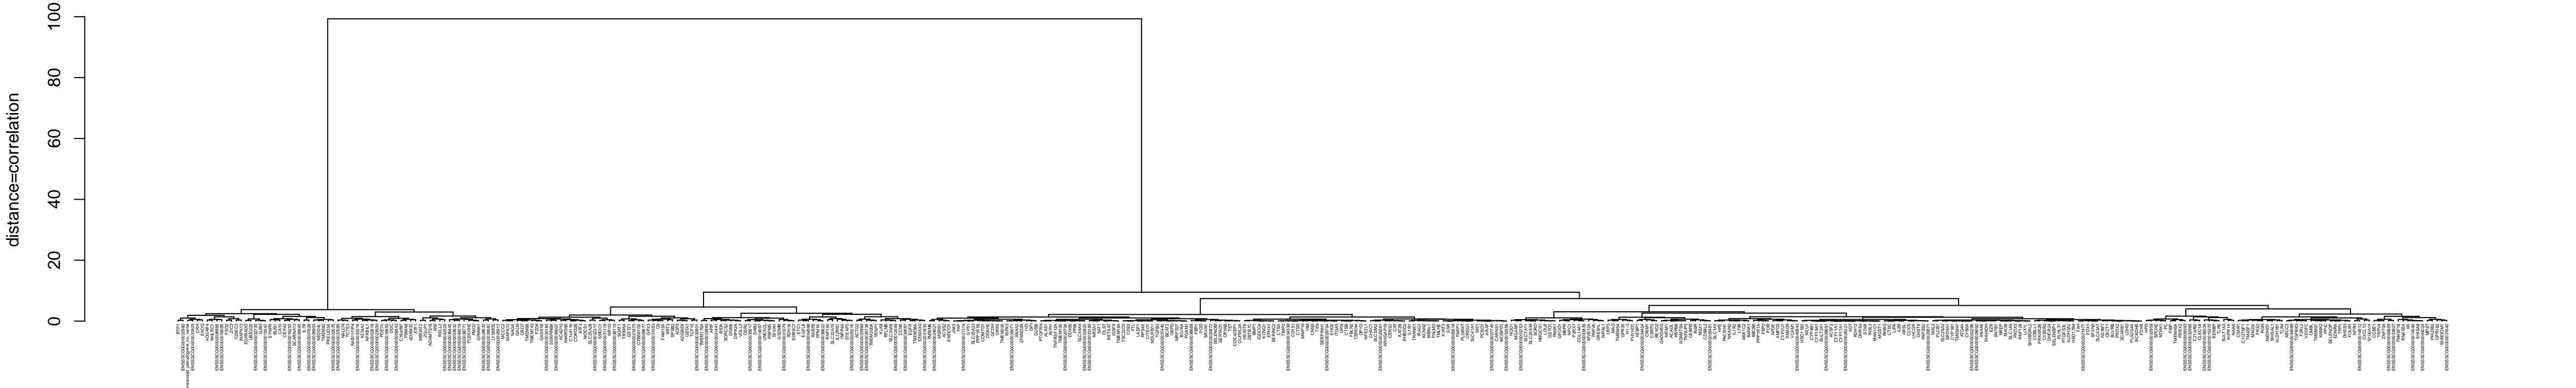

Figure S6 WGCNA-HSD17B3 (335 genes) mRNAseq-P

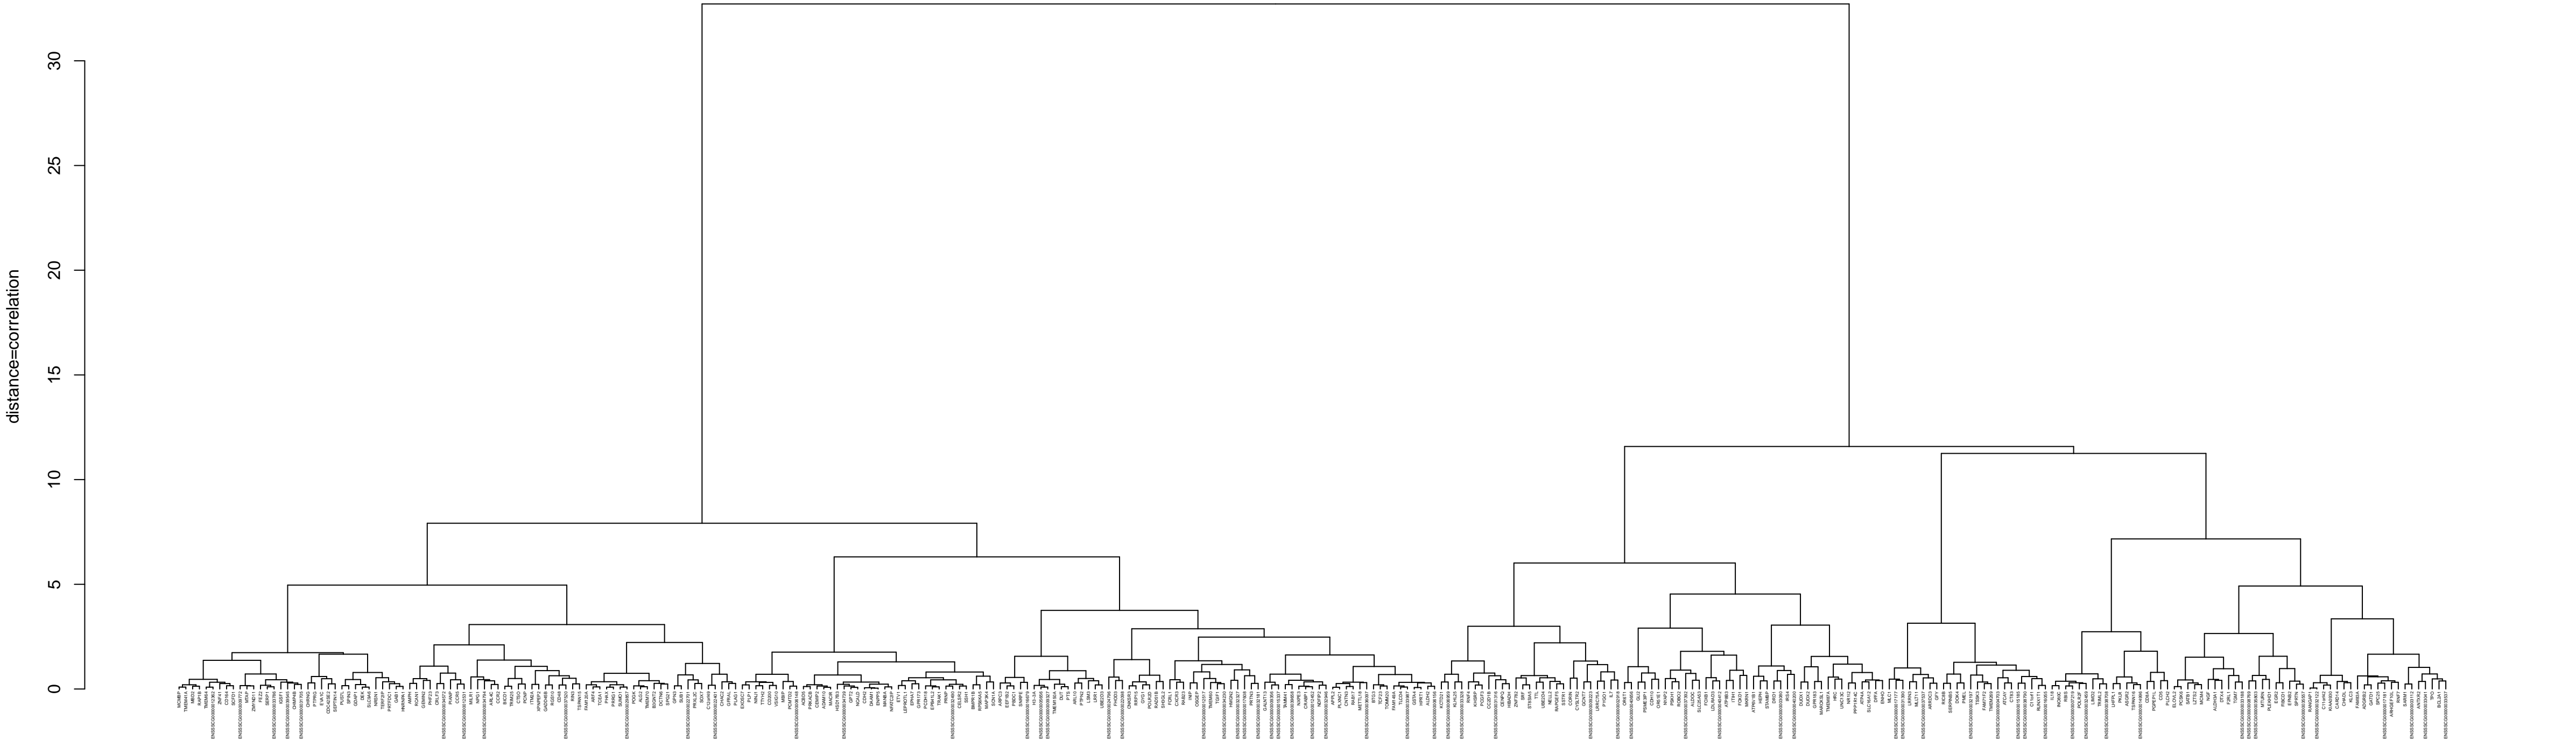

Figure S7A

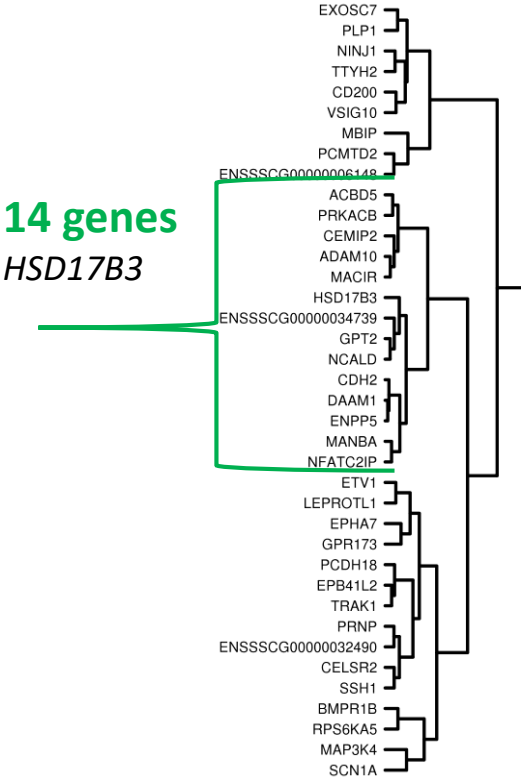

Figure S7B

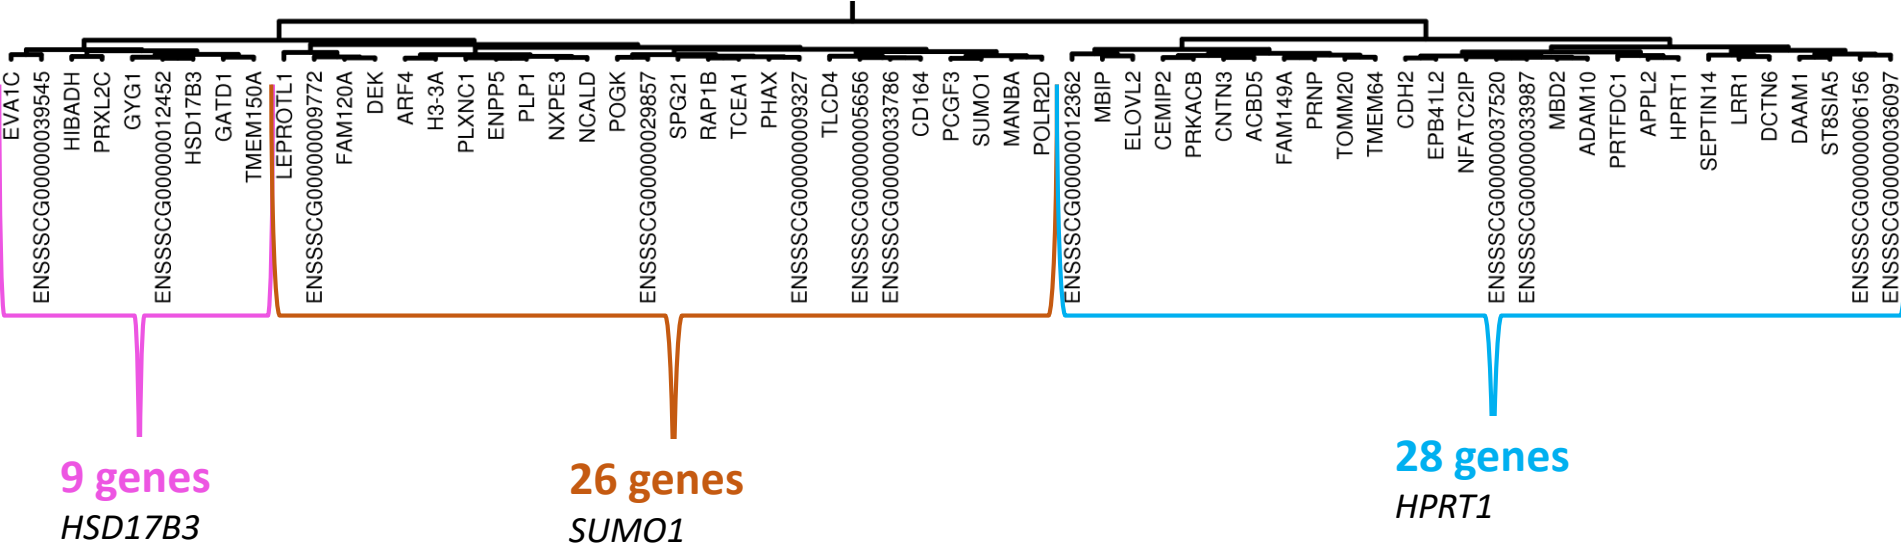

**Figure S8**    **WGCNA-HSD17B3 (335 genes) mRNAseq-PLW**

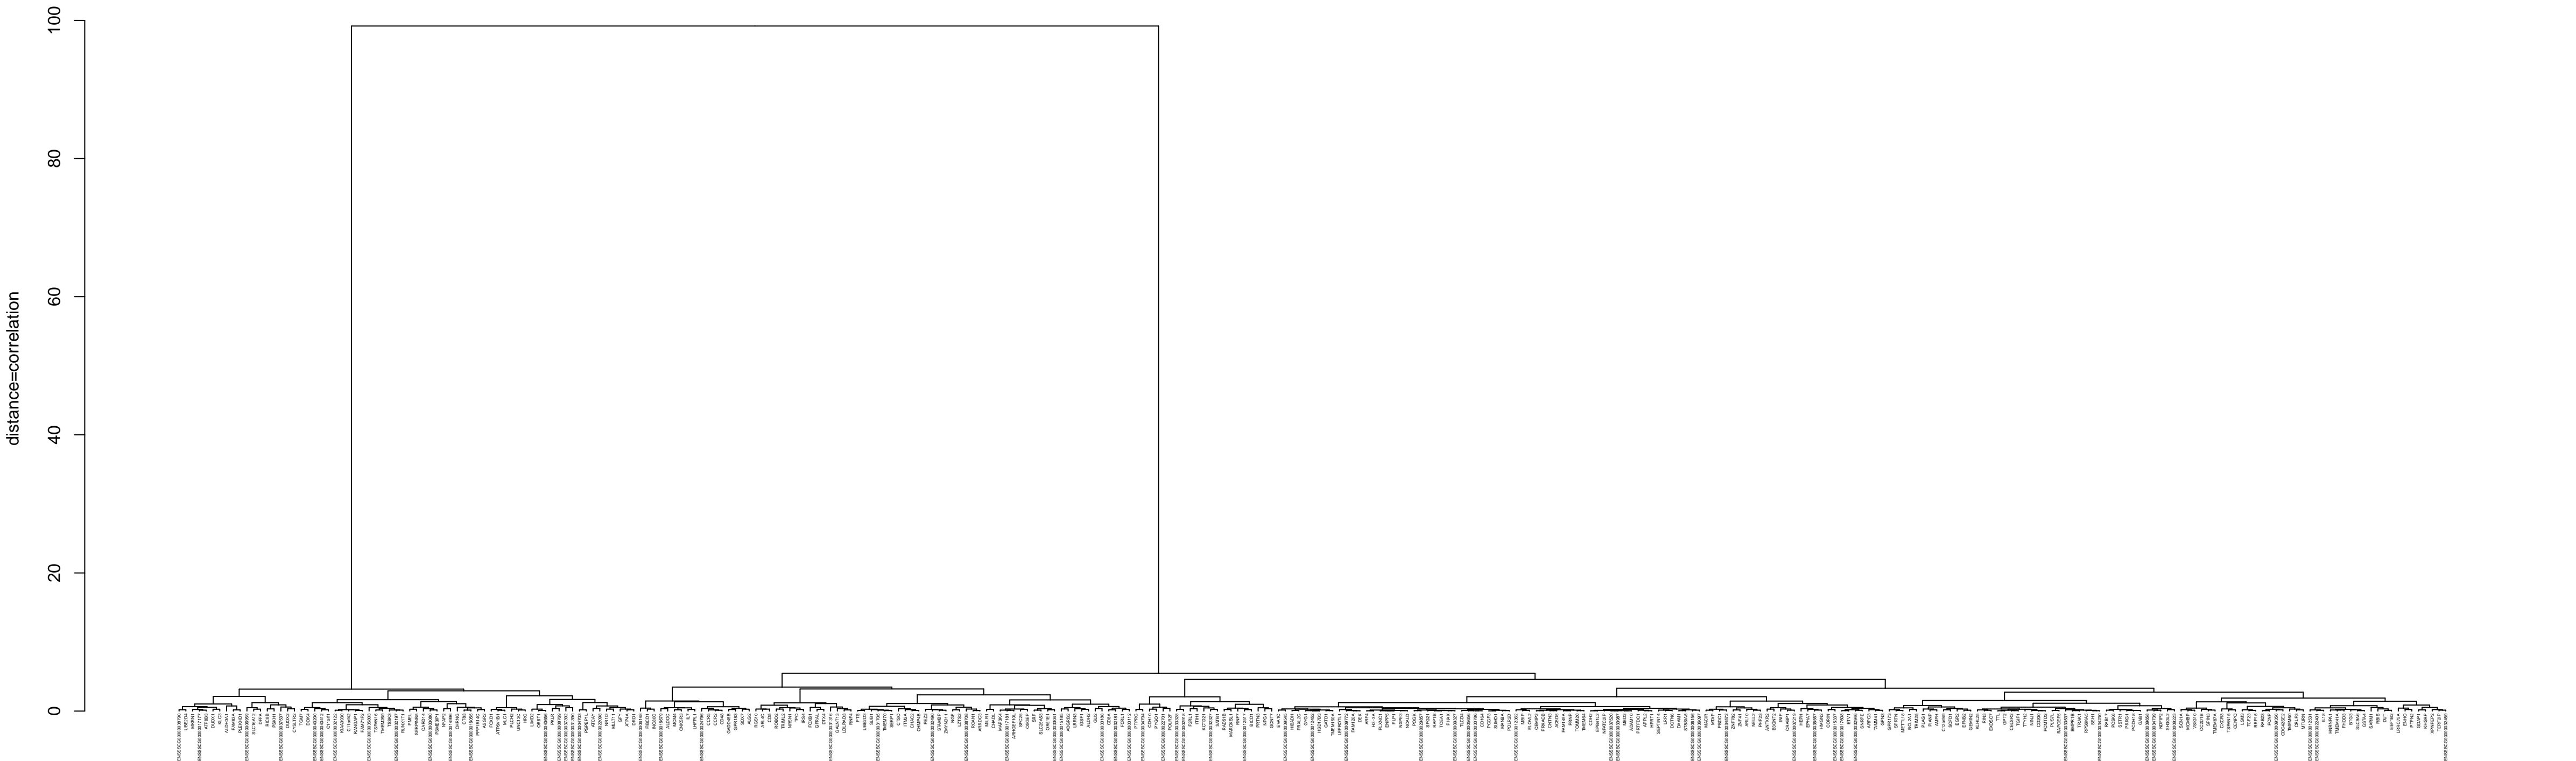

Supplement: s1 [file s1]
